# Supplementary material for: Correlating hysteresis phenomena with interfacial charge accumulation in perovskite solar cells
Source: Royal Society of Chemistry journal article supplement (doi:10.1039/c9cp05381f), 2019-11-28
Supplement: c9cp05381f1.pdf [file c9cp05381f1.pdf]

## Electronic Supplementary Information

# Correlating Hysteresis Phenomena to Interfacial Charge Accumulation in Perovskite Solar Cells

**Tianyang Chen, Zhe Sun,\* Mao Liang and Song Xue\***

*Tianjin Key Laboratory of Organic Solar Cells and Photochemical Conversion, School of Chemistry & Chemical Engineering, Tianjin University of Technology, Tianjin 300384, P. R. China.*

*Fax: +86-22-60214252*

*Tel: +86-22-60214250*

*E-mail: zhesun@tjut.edu.cn, xuesong@ustc.edu.cn;*

## List of Contents

|                                                                                      |     |
|--------------------------------------------------------------------------------------|-----|
| 1. Physical model and numerical details. ....                                        | S1  |
| 2. Effect of charge transfer rate constant on photovoltaic performance of PSCs ..... | S8  |
| 3. Expression of open circuit voltage .....                                          | S9  |
| 4. Energy diagram of an operating PSC at short and open circuit .....                | S10 |
| 5. Profiles of electrostatic voltage and the screening of electric field .....       | S11 |

## 1. Physical model and numerical details

Planar perovskite solar cell (PSC), as indicated in Figure S1, is configured as electron selective layer(ESL)|perovskite(PS)|hole selective layer(HSL). The transport of photo-generated electrons and holes throughout PSC is described by drift-diffusion (D-D) equations in 1 D. Current densities of electron ( $j_n$ ) and hole ( $j_p$ ) are given by

$$j_n = -\mu_n \left( qn \frac{\partial V}{\partial x} - k_B T \frac{\partial n}{\partial x} \right) \quad (S1)$$

$$j_p = -\mu_p \left( qp \frac{\partial V}{\partial x} + k_B T \frac{\partial p}{\partial x} \right) \quad (S2)$$

where  $q$  is the elementary charge,  $k_B$  is Boltzmann constant,  $T$  is absolute temperature,  $V$  is the profile of electrostatic potential,  $n$  and  $p$  are electron and hole densities,  $\mu_n$  and  $\mu_p$  represent the mobility of electron and hole, respectively.

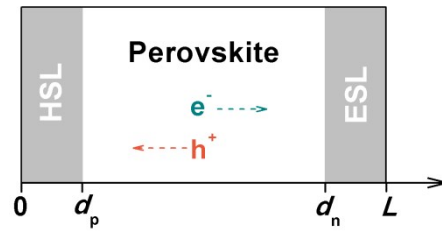

**Fig. S1** Schematic of perovskite device. Symbols “ESL” and “HSL” stand for electron selective layer and hole selective layer, respectively. Cartesian coordinates of PS/ESL and HSL/PS interfaces are marked as “ $d_n$ ” and “ $d_p$ ”, respectively.

Movable cations and anions are assumed to redistribute in perovskite layer in response to the variation of electric field. Thereby, current densities of the ions are written as

$$j_a = -\mu_a \left( qa \frac{\partial V}{\partial x} - k_B T \frac{\partial a}{\partial x} \right) \quad (S3)$$

$$j_c = -\mu_c \left( qc \frac{\partial V}{\partial x} + k_B T \frac{\partial c}{\partial x} \right) \quad (S4)$$

where  $a$  and  $c$  are anion and cation densities,  $\mu_a$  and  $\mu_c$  account for the motilities of anion and cation, respectively.

The profile of electrostatic potential is obtained by solving Poisson's equation, which takes the form,

$$\frac{\partial^2 V}{\partial x^2} = \begin{cases} -\frac{q}{\epsilon_0 \epsilon_E} (N_A^- - p) & x \in [0, d_p) \\ -\frac{q}{\epsilon_0 \epsilon_{PS}} (n - p + a - c) & x \in [d_p, d_n] \\ -\frac{q}{\epsilon_0 \epsilon_H} (n - N_D^+) & x \in (d_n, L] \end{cases} \quad (S5)$$

where  $\epsilon_0$  is vacuum permittivity,  $\epsilon_E$ ,  $\epsilon_{PS}$ , and  $\epsilon_H$  are relative permittivity for SEL, perovskite layer, and HSL, respectively. Parameters  $N_A^-$  and  $N_D^+$  indicate the densities of ionized n-type and p-type dopants in hole and electron selective layers, respectively.

When PSC is operating in steady state, the distributions of electron, hole, anion, and cation obey the continuity equations,

$$\begin{cases} \frac{\partial j_p}{\partial x} = 0 & x \in [0, d_p) \\ \frac{1}{q} \frac{\partial j_T}{\partial x} = \nu (G_{in} - R_r) & x \in [d_p, d_n] \\ \frac{\partial j_n}{\partial x} = 0 & x \in (d_n, L] \end{cases} \quad (S6)$$

where subscript “T” stands for n, p, a, and c. The prefactor  $\nu$  is given by

$$v = \begin{cases} 1 & T = p \\ -1 & T = n \\ 0 & T = a \text{ or } c \end{cases} \quad (S7)$$

The rate of electron/hole generation  $G_{in}$  is assumed to be invariant. Charge loss is attributed to bulk recombination inside perovskite layer and surface recombination at the contacts between perovskite and charge selective layers. Bulk recombination is described by using bimolecular model. Accordingly, recombination rate is written as

$$R_b = k_{rb}(np - n_i^2) \quad (S8)$$

Where  $k_{rb}$  is bimolecular recombination rate constant,  $n_i$  is intrinsic carrier density. In addition, surface recombination is assumed to occur via trapping states. It follows that surface recombination rate is evaluated based on Shockley–Read–Hall (SRH) equation,<sup>1</sup>

$$R_{SRH} = \frac{np - n_i^2}{(n + n_1)/k_{sp} + (p + p_1)/k_{sn}} \quad (S9)$$

where  $n_1$  and  $p_1$  are the densities of electron and hole at trapping state,  $k_{sp}$  and  $k_{sn}$  are the rate constant. According to the model by Courtier et al., surface recombination at ESL/PS boundary is limited by the density of trapped electrons and free holes in PS surface, while the recombination at PS/HSL boundary is determined by the density of trapped holes and free electrons.<sup>2-3</sup> Eqn S9 is reduced to

$$R_{SRH}|_{d_p} = k_{sp}p \quad (S10)$$

$$R_{SRH}|_{d_n} = k_{sn}n \quad (S11)$$

Note that  $k_{sp}$  and  $k_{sn}$  are assumed to be equal. They are both termed as  $k_s$  in our simulations for simplicity.

Boundary conditions for solving drift-diffusion equations s5 and s6 are summarized as follows:

$$p(0) = p_0$$

$$n(L) = n_0$$

$$j_n(d_p) = 0$$

$$j_p(d_n) = 0$$

$$V(0) = V_{app} - V_{bi}/2$$

$$V(L) = \frac{V_{bi}}{2}$$

where  $V_{app}$  is the bias voltage applied to the metallic contacts of PSCs,  $V_{bi}$  is built-in electric field.

The electric displacement at the ESL/PS and PS/HSL interfaces is formulated by

$$\epsilon_{PS} \nabla_x V(d_n) \big|_+ = \epsilon_E \nabla_x V(d_n) \big|_- \quad (S18)$$

$$\epsilon_H \nabla_x V(d_p) \big|_+ = \epsilon_{PS} \nabla_x V(d_p) \big|_- \quad (S19)$$

Charge transfer crossing ESL/PS and PS/HSL interfaces is assumed to be driven by the difference of the Fermi-level at two sides of each contact. Assuming equal exchange rate constant ( $k_{et}$ ) for the forward and reverse charge transfer direction, charge transfer current ( $j_{tr}$ ) is given by,

$$j_{tr}^n = qk_{et} [\exp(-\alpha\eta_n) - \exp(\alpha\eta_n)] \quad (S20)$$

$$j_{tr}^p = qk_{et} [\exp(-\alpha\eta_p) - \exp(\alpha\eta_p)] \quad (S21)$$

where  $\alpha$  is charge transfer coefficient, and  $\eta_n$  and  $\eta_p$  are the Fermi-level difference at ESL/PS and PS/HSL boundaries, respectively. The  $\eta_n$  and  $\eta_p$  are given by,

$$\eta_n = E_{F,n}(d_n^-) - E_{F,n}(d_n^+) \quad (S22)$$

$$\eta_p = E_{F,n}(d_p^+) - E_{F,n}(d_p^-) \quad (S23)$$

where subscripts “-” and “+” indicate the right and left side of the interface, respectively.

The operation of DSCs is mimicked by solving the D-D equations (eqns S5 and S6) numerically. Kinetics of charge extraction at HSL/PS and PS/ESL contacts is considered by incorporating eqns S20 and S21 into the equation set. The resultant equation system was solved by using finite-difference scheme in conjunction with relaxed iterative algorithm. Parameters utilized for simulation are enlisted in Table S1. Spatial variables, such as  $n$ ,  $p$ ,  $a$ ,  $c$ , and  $V$ , are discretized with non-uniform grid meshing. As indicated in Figure S2, fine-meshing of 0.1 nm is applied to the domains of 20 nm centering at the PS/ESL and HSL/PS boundaries. Those red domains are demonstrated to be wide enough to cover the narrow Debye layer, and hence give rise to a good convergence. In the rest of the domains, coarse-grained grid of 5 nm is employed for balancing computation time and the precision of solution.

When simulating  $j$ - $V$  hysteresis, model device is firstly preconditioned at the bias voltage of 0 and 1.2 V for forward and reverse scans, respectively. In this scenario, both charge carriers and movable ions are allowed to relax to their equilibrium profiles. After the preconditioning, swift  $j$ - $V$  scanning is performed in which the distribution of electron and hole evolve at each scan step while mobile ions are frozen at their initial position.

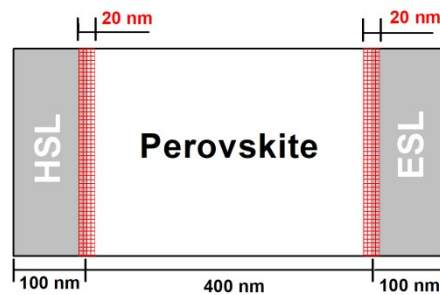

**Fig. S2** Schematic of spatial meshing in perovskite device. Red girds highlight the parts where fine-grid meshing is employed in simulation.

**Table S1 Parameters for Device Simulation.**

| Parameter                               | Symbol          | Unit                 | Value                                     | References |
|-----------------------------------------|-----------------|----------------------|-------------------------------------------|------------|
| Conduction band edge in perovskite      | $E_c^{PS}$      | $eV$                 | -3.93                                     | 4          |
| Valence band edge in perovskite         | $E_v^{PS}$      | $eV$                 | -5.43                                     | 4          |
| Conduction band edge in ESL             | $E_c^E$         | $eV$                 | -4.0                                      | 5          |
| Valence band edge in HSL                | $E_v^H$         | $eV$                 | -5.22                                     | 6          |
| relative permittivity of perovskite     | $\epsilon_{PS}$ | —                    | 6.5                                       | 7          |
| Relative permittivity of ESL            | $\epsilon_E$    | —                    | 80.0                                      |            |
| Relative permittivity of HSL            | $\epsilon_H$    | —                    | 3.0                                       | 7          |
| Electron mobility in perovskite         | $\mu_n^{PS}$    | $cm^2 V^{-1} s^{-1}$ | 9.90                                      | 8          |
| Hole mobility in perovskite             | $\mu_p^{PS}$    | $cm^2 V^{-1} s^{-1}$ | 9.90                                      | 7          |
| Electron mobility in ESL                | $\mu_n^E$       | $cm^2 V^{-1} s^{-1}$ | $4.0 \times 10^{-5}$                      | 9          |
| Hole mobility in HSL                    | $\mu_p^H$       | $cm^2 V^{-1} s^{-1}$ | $1 \times 10^{-3}$                        | 9          |
| Charge generation rate                  | $G_{in}$        | $cm^{-3} s^{-1}$     | $3.4 \times 10^{21}$                      | 10         |
| Bimolecular recombination rate constant | $k_{rb}$        | $cm^3 s^{-1}$        | $6 \times 10^{-8}$<br>$6 \times 10^{-12}$ |            |
| Exchange rate constant                  | $k_s$           | $cm^{-2} s^{-1}$     | 0.01~0.1                                  |            |
| Charge transfer coefficient,            | $\alpha$        | —                    | 0.5                                       | 11         |
| Density of states (DOS)                 | $N_0$           | $cm^{-3}$            | $6 \times 10^{19}$                        |            |
| Mobile cation concentration             | $N_{ca}$        | $cm^{-3}$            | $1 \times 10^{18}$                        | 12         |
| Mobile anion concentration              | $N_{an}$        | $cm^{-3}$            | $1 \times 10^{18}$                        | 12         |

|                            |              |                  |                    |    |
|----------------------------|--------------|------------------|--------------------|----|
| Acceptor concentration     | $N_A^-$      | $\text{cm}^{-3}$ | $5 \times 10^{17}$ | 13 |
| Donor concentration        | $N_D^+$      | $\text{cm}^{-3}$ | $5 \times 10^{17}$ | 13 |
| Position of HSL/PS contact | $d_p$        | nm               | 100                |    |
| Position of PS/ESL contact | $d_n$        | nm               | 500                |    |
| Thickness of device        | $L$          | nm               | 600                |    |
| Sparse grid size           | $\Delta x_S$ | nm               | 5                  |    |
| Fine grid size             | $\Delta x_F$ | nm               | 0.1                |    |

## 2. Effect of charge transfer rate constant on photovoltaic performance of PSCs

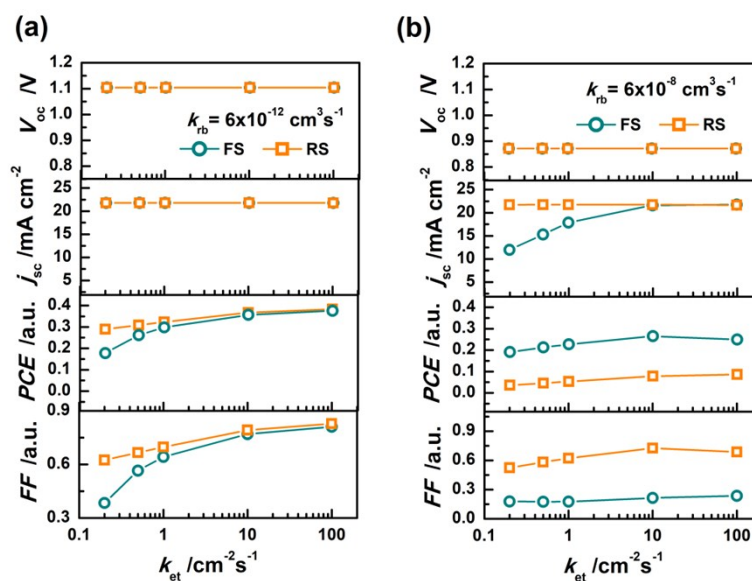

**Fig. S3** Photovoltaic parameters for PSCs with variable charge transfer rate constant. Green and yellow curves are obtained under forward and reverse scans, respectively. In images a and b, recombination

rate constant  $k_{rb}$  equals to  $6 \times 10^{-12}$  and  $6 \times 10^{-8} \text{ cm}^3\text{s}^{-1}$ , respectively.  $V_{oc}$ : open circuit voltage,  $j_{sc}$ : short circuit current density,  $\eta$ : energy conversion efficiency,  $FF$ : fill factor.

### 3. Expression of open circuit voltage

When an irradiated PSC is measured at open circuit, photogenerated electrons and holes are recombined entirely in device, namely light harvesting flux equals to recombination rate. The recombination rate is evaluated herein by considering the contributions of both radiative recombination in the bulk and surface recombination. By using eqns S8 and S9, the relationship is formulated by

$$I_0 \eta_{LH} = \int_{d_p}^{d_n} \left( k_{rb} (np - n_i^2) + \frac{np - n_i^2}{(n + n_1)/k_{sp} + (p + p_1)/k_{sn}} \delta_{surf} \right) dx \quad (S24)$$

where  $\delta_{surf}$  is the Dirac symbol which ensures the trap-mediated recombination occurs at the PS/ESL and HSL/PS contacts.

As demonstrated in Figure S3, the Fermi-level of either electron or hole is invariant to coordinate. The product of  $n$  and  $p$  is thereby related to the difference between open circuit voltage and the band gap, which is given by

$$np = N_0^2 \exp\left(\frac{q}{k_B T} (V_{oc} - E_g)\right) \quad (S25)$$

where  $V_{oc}$  is open circuit voltage, which is defined as the difference of the quasi-Fermi level between electron and hole,  $N_0$  is the density of state. After the insertion of eqn S23 into eqn S22,  $V_{oc}$  is expressed as

$$V_{oc} = E_g + \frac{k_B T}{q} \ln \left( \frac{I_0 \eta_{LH}}{N_0^2} \left( k_{rb} + \sum_{x=d_n, d_p} \frac{w_L}{(n + n_1)/k_{sp} + (p + p_1)/k_{sn}} \right)^{-1} \right) \quad (S26)$$

where  $w_L$  is the width of the domain that the traps are localized adjacent to the interfaces.

If surface recombination is neglected, one will find  $V_{oc}$  is independent of the density profiles of electron and hole, not to mention the electric field. Thereby, the  $j$ - $V$  curves under forward and reverse scans will meet at the point of  $V_{oc}$  once charge carriers are only consumed by bulk recombination.

#### 4. Energy diagram of an operating PSC at short and open circuit

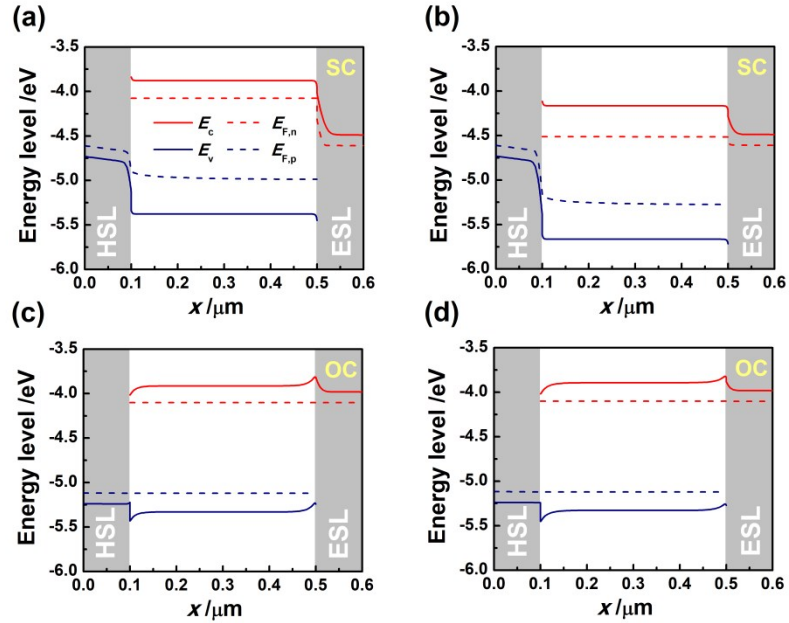

**Fig. S4** Energy diagram of the PSC at short circuit (a, b) and open circuit (c, d). Charge transfer rate constant in images (a, c) and (b, d) is 0.2 and 10  $\text{cm}^2 \text{s}^{-1}$ , respectively. Recombination rate constant  $k_{rb}$  is  $6 \times 10^{-12} \text{ cm}^3 \text{s}^{-1}$ .

## 5. Profiles of electrostatic voltage and the screening of electric field

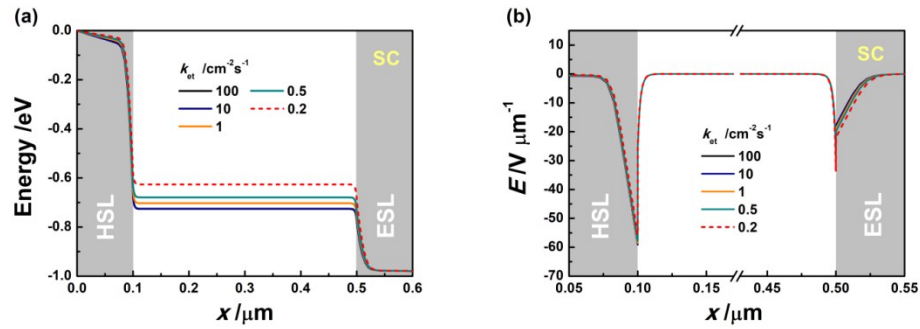

**Fig. S5** Profiles of electrostatic voltage (a) and electric field (b) at short circuit. Recombination rate constant  $k_{\text{rb}}$  is  $6 \times 10^{-8} \text{ cm}^3 \text{ s}^{-1}$ .

## References

1. Shockley, W.; Read, W. T., Statistics of the Recombinations of Holes and Electrons. *Phys. Rev.* **1952**, *87*, 835-842.
2. Courtier, N. E.; Cave, J. M.; Foster, J. M.; Walker, A. B.; Richardson, G., How Transport Layer Properties Affect Perovskite Solar Cell Performance: Insights from a Coupled Charge Transport/Ion Migration Model. *Energy Environ. Sci.* **2019**, *12*, 396-409.
3. Tress, W.; Petrich, A.; Hummert, M.; Hein, M.; Leo, K.; Riede, M., Imbalanced Mobilities Causing S-Shaped Iv Curves in Planar Heterojunction Organic Solar Cells. *Appl. Phys. Lett.* **2011**, *98*, 063301.

4. Etgar, L.; Gao, P.; Xue, Z.; Peng, Q.; Chandiran, A. K.; Liu, B.; Nazeeruddin, M. K.; Gratzel, M., Mesoscopic CH<sub>3</sub>NH<sub>3</sub>PbI<sub>3</sub>/TiO<sub>2</sub> Heterojunction Solar Cells. *J. Am. Chem. Soc.* **2012**, *134*, 17396-9.
5. Xue, H.; Fu, K.; Wong, L. H.; Birgersson, E.; Stangl, R., Modelling and Loss Analysis of Meso-Structured Perovskite Solar Cells. *J. Appl. Phys.* **2017**, *122*, 083105.
6. Do, K.; Choi, H.; Lim, K.; Jo, H.; Cho, J. W.; Nazeeruddin, M. K.; Ko, J., Star-Shaped Hole Transporting Materials with a Triazine Unit for Efficient Perovskite Solar Cells. *Chem. commun.* **2014**, *50*, 10971-4.
7. Foster, J. M.; Snaith, H. J.; Leijtens, T.; Richardson, G., A Model for the Operation of Perovskite Based Hybrid Solar Cells: Formulation, Analysis, and Comparison to Experiment. *SIAM J. Appl. Math.* **2014**, *74*, 1935-1966.
8. Herz, L. M., Charge-Carrier Mobilities in Metal Halide Perovskites: Fundamental Mechanisms and Limits. *ACS Energy Lett.* **2017**, *2*, 1539-1548.
9. Leijtens, T.; Lim, J.; Teuscher, J.; Park, T.; Snaith, H. J., Charge Density Dependent Mobility of Organic Hole-Transporters and Mesoporous TiO<sub>2</sub> Determined by Transient Mobility Spectroscopy: Implications to Dye-Sensitized and Organic Solar Cells. *Adv. Mater.* **2013**, *25*, 3227-33.
10. van Reenen, S.; Kemerink, M.; Snaith, H. J., Modeling Anomalous Hysteresis in Perovskite Solar Cells. *J. Phys. Chem. Lett.* **2015**, *6*, 3808-14.
11. Bai, P.; Bazant, M. Z., Charge Transfer Kinetics at the Solid-Solid Interface in Porous Electrodes. *Nat Commun.* **2014**, *5*, 3585.
12. Neukom, M. T.; Züfle, S.; Knapp, E.; Makha, M.; Hany, R.; Ruhstaller, B., Why Perovskite Solar Cells with High Efficiency Show Small I<sub>v</sub>-Curve Hysteresis. *Sol. Energy Mater. Sol. Cells* **2017**, *169*, 159-166.

13. Calado, P.; Telford, A. M.; Bryant, D.; Li, X.; Nelson, J.; O'Regan, B. C.; Barnes, P. R., Evidence for Ion Migration in Hybrid Perovskite Solar Cells with Minimal Hysteresis. *Nat Commun* **2016**, 7, 13831.
